# Supplementary material
Source: PubMed Central journal article supplement (PMC5679082)
Supplement: NIHMS898682-supplement-supplement_1.pdf [file NIHMS898682-supplement-supplement_1.pdf]

## Obesity alters B cell and macrophage populations in brown adipose tissue

Kristin R. Peterson<sup>1,2</sup>, David K. Flaherty<sup>3</sup>, and Alyssa H. Hasty<sup>1,4,\*</sup>

<sup>1</sup> Department of Molecular Physiology and Biophysics  
Vanderbilt University School of Medicine, Nashville, Tennessee 37232

<sup>2</sup> Department of Pharmacology  
Vanderbilt University School of Medicine, Nashville, Tennessee 37232

<sup>3</sup> Flow Cytometry Shared Resource  
Vanderbilt Vaccine Center, Nashville, Tennessee 37232

<sup>4</sup> Department of Veteran Affairs,  
Tennessee Valley Healthcare System, Nashville, Tennessee 37212

\* Correspondence should be addressed to:

Alyssa H. Hasty, PhD

Room 702 Light Hall, Nashville, TN 37232-0615

Phone: 615-322-5177

Fax: 615-322-8973

Email: [alyssa.hasty@vanderbilt.edu](mailto:alyssa.hasty@vanderbilt.edu)

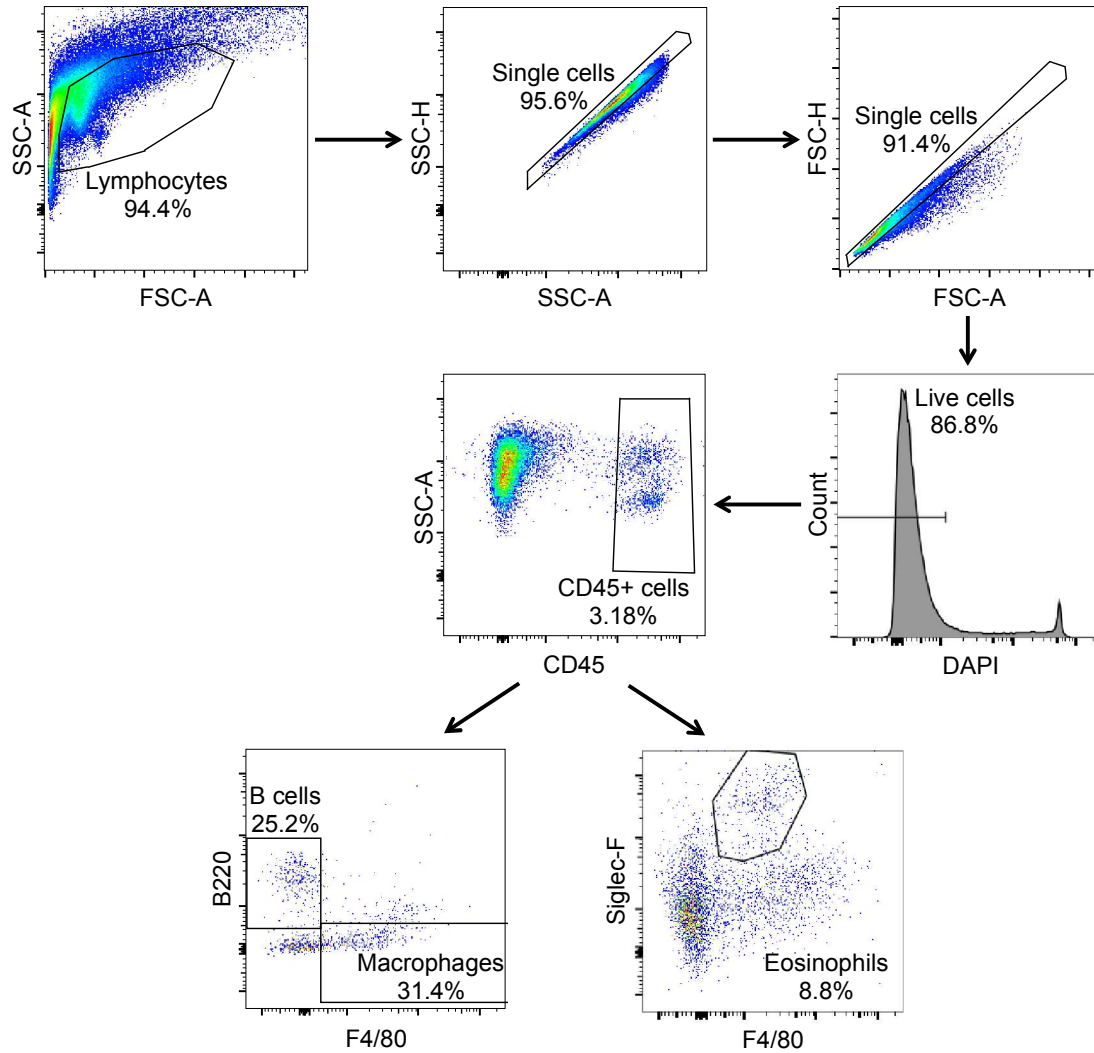

### Supplementary Figure S1. Flow cytometry gating scheme.

Leukocytes were identified initially by their forward scatter (FSC) and side scatter (SSC) properties. Subsequent FSC and SSC pulse geometry gates were used to eliminate aggregating cells. Viable leukocytes were identified as DAPI-, CD45+ cells. From CD45+ cells, the analysis of B cells (B220+, F4/80-) and macrophages (B220-, F4/80+) was achieved by using a dot plot. Eosinophils were gated from CD45+ leukocytes as F4/80+ and SiglecF+.

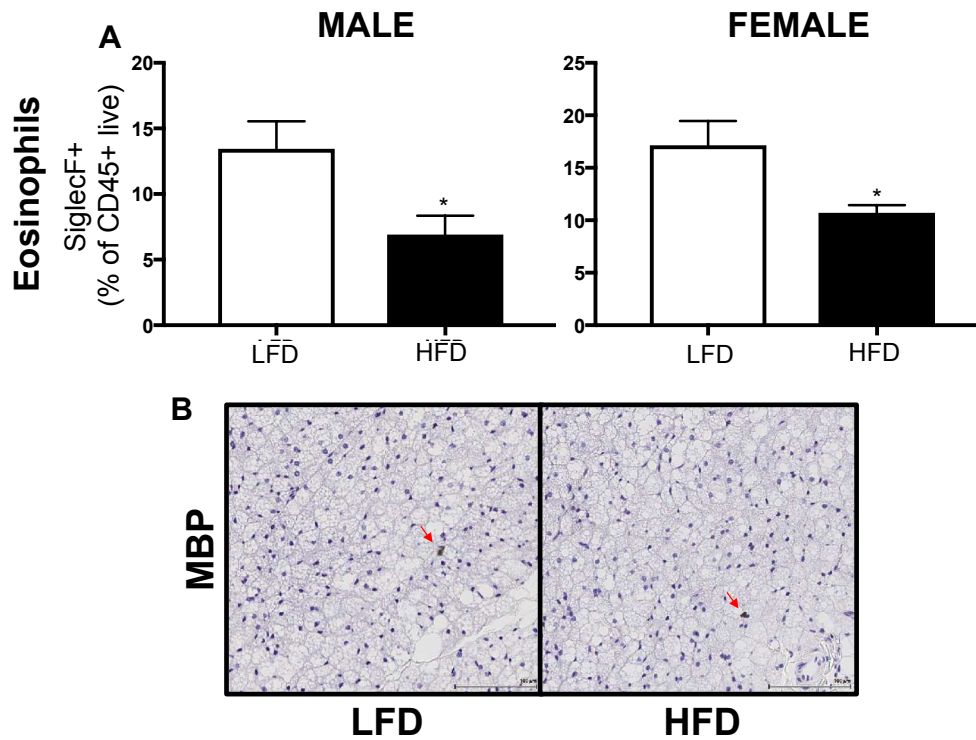

**Supplementary Figure S2. Flow cytometry and immunohistochemistry of brown adipose tissue (BAT) for eosinophils.**

BAT was collected from wild type C57BL/6J mice after 8 weeks of 10% low fat diet (LFD, white bars) or 60% high fat (HFD, black bars). **A.** SVF from BAT was processed and analyzed by flow cytometry for SiglecF+ eosinophils and presented as percent of CD45+ live cells. Data are presented as mean  $\pm$  SEM of 5 samples per group. **B.** BAT was fixed in 10% formalin before further processing and staining for MBP. Data presented are representative images from 3 samples per group.

\*  $P < 0.05$

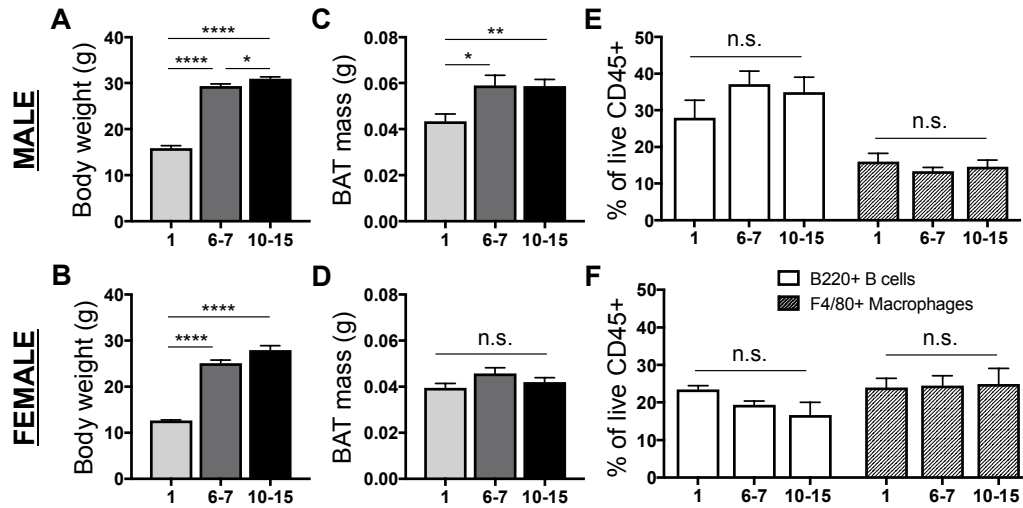

**Supplementary Figure S3. Analysis of brown adipose tissue (BAT) immune cells with aging.**

Male and female wild type C57BL/6J mice were aged to 1, 6-7, or 10-15 months. Their final body weight was measured (**A**: male, **B**: female), and BAT was collected and weighed (**C**: male, **D**: female). BAT stromal vascular fraction was processed and analyzed by flow cytometry for B220+ B cells (white bars) and F4/80+ macrophages (hatched bars) as a % of CD45+ live cells (**E**: male, **F**: female). Data are presented as mean  $\pm$  SEM of 4-18 samples per group.

\*  $P < 0.05$

\*\*  $P < 0.01$

\*\*\*\*  $P < 0.0001$

n.s.  $P > 0.05$
